# Supplementary material for: Lemon Juice, Sesame Paste, and Autoclaving Influence Iron Bioavailability of Hummus: Assessment by an In Vitro Digestion/Caco-2 Cell Model
Source: MDPI journal article supplement (doi:10.3390/foods9040474), 2020-04-10
Supplement: s1 [file s1]

# Lemon Juice, Sesame Paste, and Autoclaving Influence Iron Bioavailability of Hummus: Assessment by an In Vitro Digestion/Caco-2 Cell Model

Nour Doumani\*, Isabelle Severin, Laurence Dahbi, Elias Bou-Maroun, Maya Tueni, Nicolas Sok, Marie-Christine Chagnon, Jacqueline Maalouly and Philippe Cayot

## Table of contents

|                                                                                                                                       |   |
|---------------------------------------------------------------------------------------------------------------------------------------|---|
| <b>Figure S1.</b> Scheme of iron dialysis from digestat to buffer solution through a dialysis membrane .....                          | 2 |
| <b>Figure S2.</b> Scheme of the dual chamber system of iron uptake by the Caco-2 cells.....                                           | 2 |
| <b>Figure S3.</b> Representation of Pearson's Correlation critical values' table. ....                                                | 3 |
| <b>Table S1.</b> Theoretical predominant form(s) of acids along the <i>in vitro</i> digestion at different pH values (2, 7, 8.5)..... | 4 |

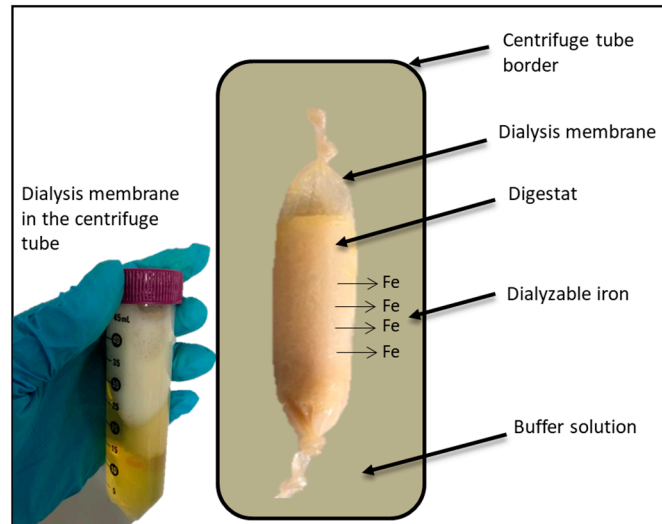

**Figure S1.** Scheme of iron dialysis from digestat to buffer solution through a dialysis membrane

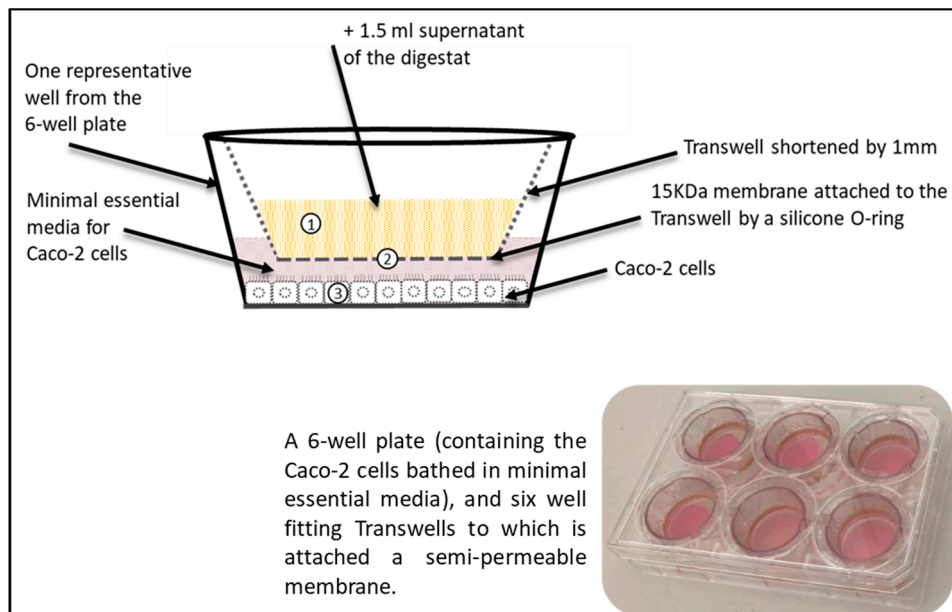

**Figure S2.** Scheme of the dual chamber system of iron uptake by the Caco-2 cells. 1) Iron in the digestapoured in the upper chamber formed by the Transwell, 2) iron diffusion to the lower chamber through a 15 KDa membrane attached to the Transwell by a silicone O-ring and 3) iron uptake by the Caco-2 cells, and eventually ferritin formation.

| Table R Critical Values of the Correlation Coefficient |                                              |      |       |       |
|--------------------------------------------------------|----------------------------------------------|------|-------|-------|
| df                                                     | Levels of Significance for a One-Tailed Test |      |       |       |
|                                                        | .05                                          | .025 | .01   | .005  |
|                                                        | Levels of Significance for a Two-Tailed Test |      |       |       |
|                                                        | .10                                          | .05  | .02   | .01   |
| 1                                                      | .988                                         | .997 | .9995 | .9999 |
| 2                                                      | .900                                         | .950 | .980  | .990  |
| 3                                                      | .805                                         | .878 | .934  | .959  |
| 4                                                      | .729                                         | .811 | .882  | .917  |
| 5                                                      | .669                                         | .754 | .833  | .874  |
| 6                                                      | .622                                         | .707 | .789  | .834  |
| 7                                                      | .582                                         | .666 | .750  | .798  |
| 8                                                      | .549                                         | .632 | .716  | .765  |
| 9                                                      | .521                                         | .602 | .685  | .735  |
| 10                                                     | .497                                         | .576 | .658  | .708  |
| 11                                                     | .476                                         | .553 | .634  | .684  |
| 12                                                     | .458                                         | .532 | .612  | .661  |
| 13                                                     | .441                                         | .514 | .592  | .641  |
| 14                                                     | .426                                         | .497 | .574  | .623  |
| 15                                                     | .412                                         | .482 | .558  | .606  |
| 16                                                     | .400                                         | .468 | .542  | .590  |
| 17                                                     | .389                                         | .456 | .528  | .575  |
| 18                                                     | .378                                         | .444 | .516  | .561  |
| 19                                                     | .369                                         | .433 | .503  | .549  |
| 20                                                     | .360                                         | .423 | .492  | .537  |
| 21                                                     | .352                                         | .413 | .482  | .526  |
| 22                                                     | .344                                         | .404 | .472  | .515  |
| 23                                                     | .337                                         | .396 | .462  | .505  |
| 24                                                     | .330                                         | .388 | .453  | .496  |
| 25                                                     | .323                                         | .381 | .445  | .487  |
| 26                                                     | .317                                         | .374 | .437  | .479  |
| 27                                                     | .311                                         | .367 | .430  | .471  |
| 28                                                     | .306                                         | .361 | .423  | .463  |
| 29                                                     | .301                                         | .355 | .416  | .456  |
| 30                                                     | .296                                         | .349 | .409  | .449  |
| 32                                                     | .287                                         | .339 | .397  | .436  |
| 34                                                     | .279                                         | .329 | .386  | .424  |
| 36                                                     | .271                                         | .320 | .376  | .413  |
| 38                                                     | .264                                         | .312 | .367  | .403  |
| 40                                                     | .257                                         | .304 | .358  | .393  |
| 42                                                     | .251                                         | .297 | .350  | .384  |

(continued)

Figure S3. Representation of Pearson's Correlation critical values' table [59].

**Table S1.** Theoretical predominant form(s) of acids along the in vitro digestion at different pH values (2, 7, 8.5).

|                                                                                                                         | pH 2 (gastric phase) | pH 7 (intestinal phase) | pH 8.5 (end of intestinal phase) |
|-------------------------------------------------------------------------------------------------------------------------|----------------------|-------------------------|----------------------------------|
| <b><u>Citric acid</u></b> <sup>[72]</sup><br><br><b>pKa1</b><br>3.1<br><br><b>pKa2</b><br>4.7<br><br><b>pKa3</b><br>6.4 |                      |                         |                                  |
| <b><u>Malic acid</u></b> <sup>[73]</sup><br><br><b>pKa1</b><br>3.51<br><br><b>pKa2</b><br>5.03                          |                      |                         |                                  |
| <b><u>Ascorbic acid</u></b> <sup>[74]</sup><br><br><b>pKa1</b><br>4.17<br><br><b>pKa2</b><br>11.57                      |                      |                         |                                  |
